# Supplementary material for: Influence of Carbonate Solvents on Solid Electrolyte Interphase Composition over Si Electrodes Monitored by In Situ and Ex Situ Spectroscopies
Source: PubMed Central journal article supplement — ACS Omega. 2021 Oct 5;6(41):27335–50. doi: 10.1021/acsomega.1c04226 (PMC8529680; doi:10.1021/acsomega.1c04226), 2021-10-05
Supplement: ao1c04226_si_001.pdf [file ao1c04226_si_001.pdf]

## Supporting Information

### **Influence of carbonate solvents on SEI composition over Si electrode monitored by *in situ* and *ex situ* spectroscopies**

Zhan-Yu Wu<sup>1</sup>, Yan-Qiu Lu<sup>2</sup>, Jun-Tao Li<sup>2\*</sup>, Sandrine Zanna<sup>1</sup>, Antoine Seyeux<sup>1</sup>, Ling Huang<sup>3</sup>, Shi-Gang Sun<sup>2,3</sup>, Philippe Marcus<sup>1</sup>, Jolanta Światowska<sup>1\*</sup>

<sup>1</sup> *PSL Research University, CNRS – Chimie ParisTech, Institut de Recherche de Chimie Paris (IRCP), 11 rue Pierre et Marie Curie, 75005 Paris, France*

<sup>2</sup> *College of Energy, Xiamen University, Xiamen 361005, China*

<sup>3</sup> *State Key Laboratory of Physical Chemistry of Solid Surfaces, College of Chemistry and Chemical Engineering, Xiamen University, Xiamen 361005, China*

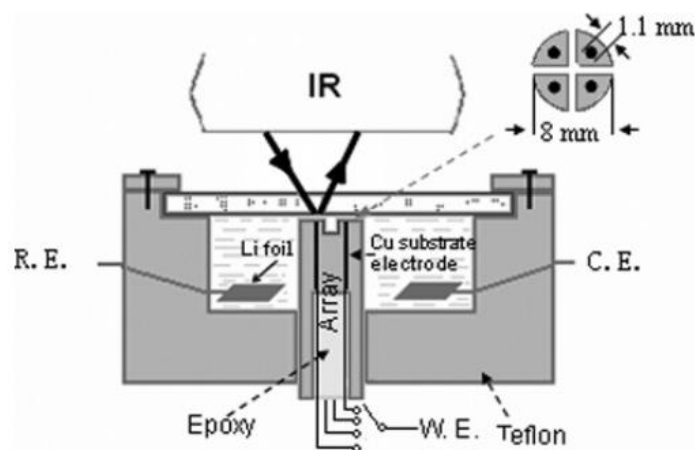

Figure S1 Schematic diagram of *in situ* three-electrode microscope FTIRS cell

### C 1s comparison

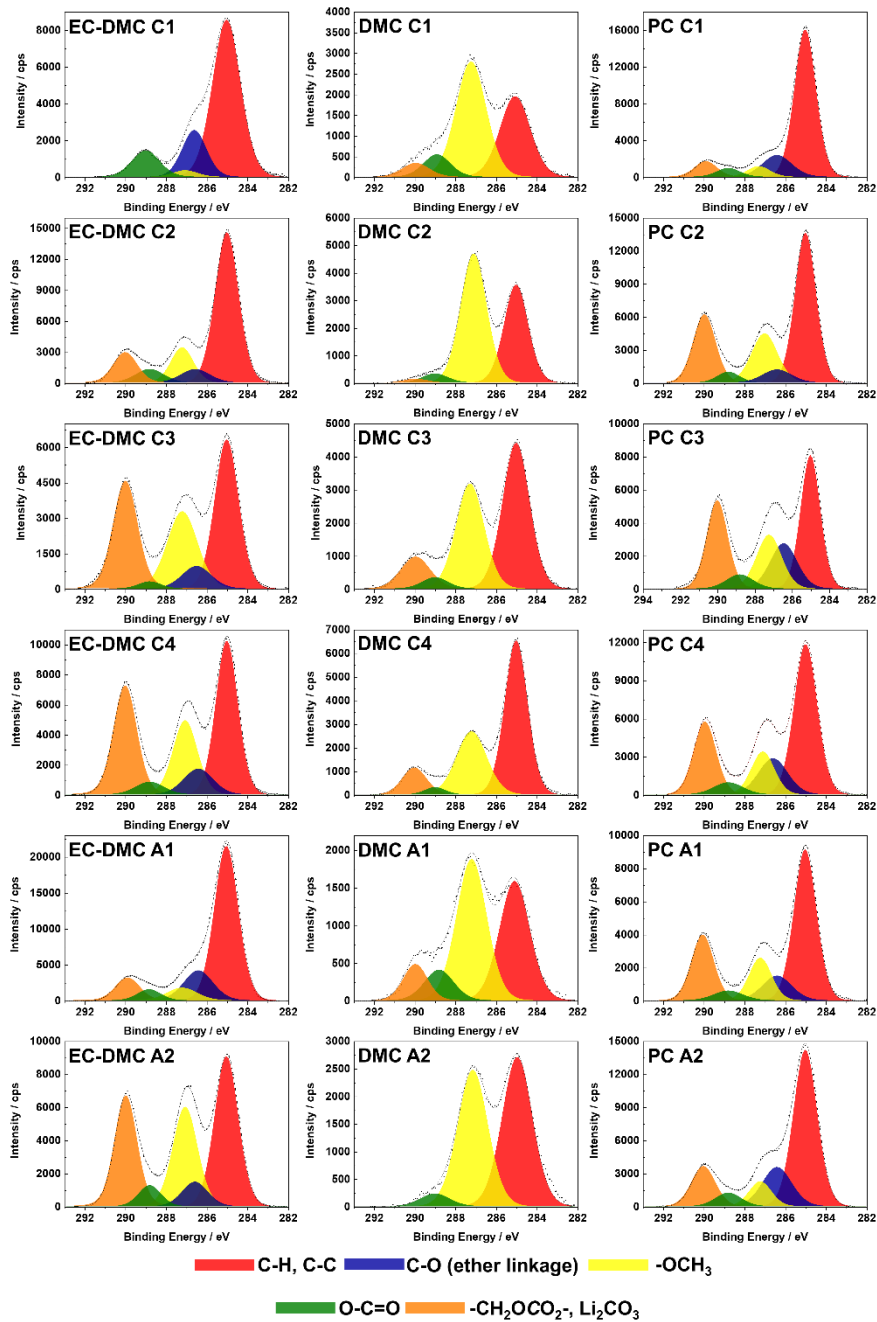

Figure S2 High resolution C 1s core level spectra obtained for Si electrodes at different states during the first CV cycle in three different electrolytes (1M LiPF<sub>6</sub>/EC-DMC, 1M LiPF<sub>6</sub>/DMC and 1M LiPF<sub>6</sub>/PC).

### F 1s comparison

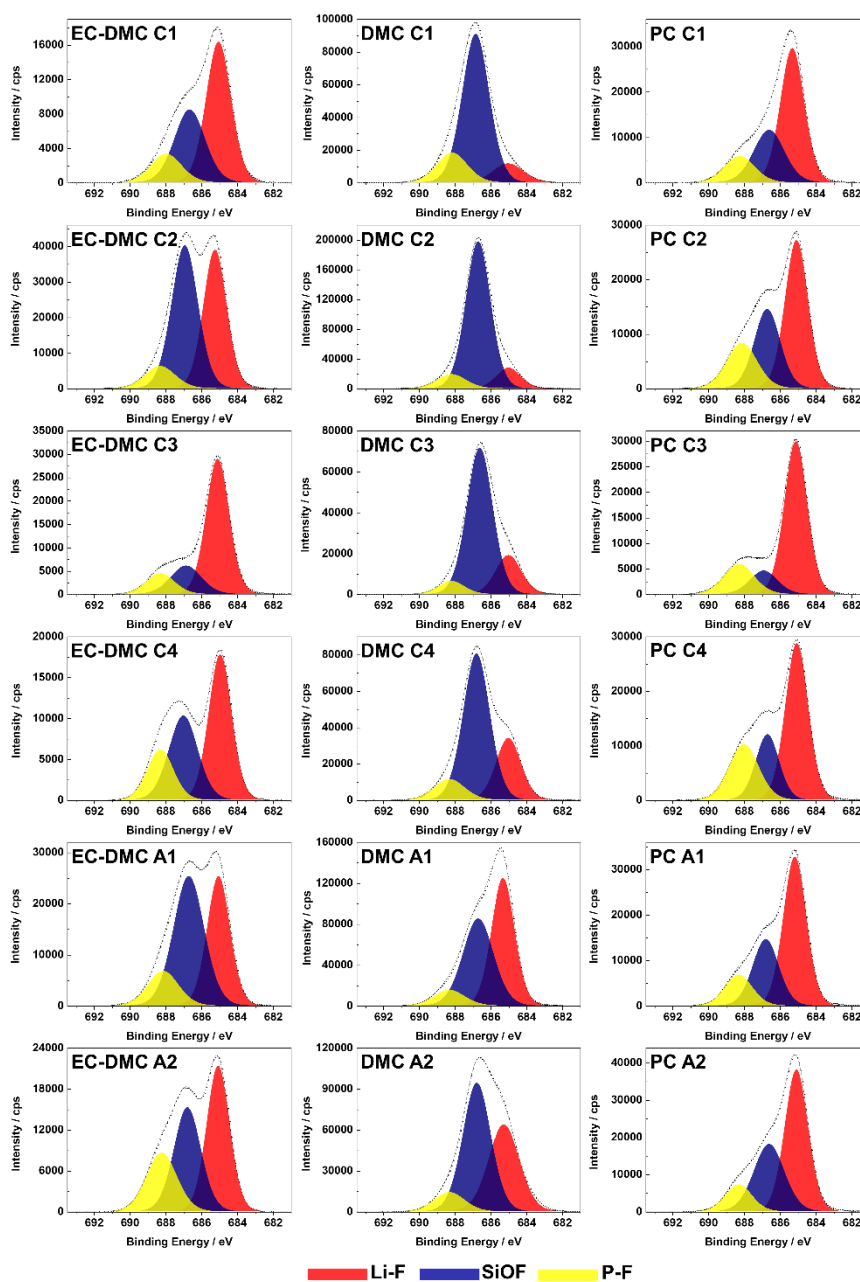

Figure S3 High resolution F 1s core level spectra obtained for Si electrodes at different states during the first CV cycle in three different electrolytes (1M LiPF<sub>6</sub>/EC-DMC, 1M LiPF<sub>6</sub>/DMC and 1M LiPF<sub>6</sub>/PC).

### O 1s comparison

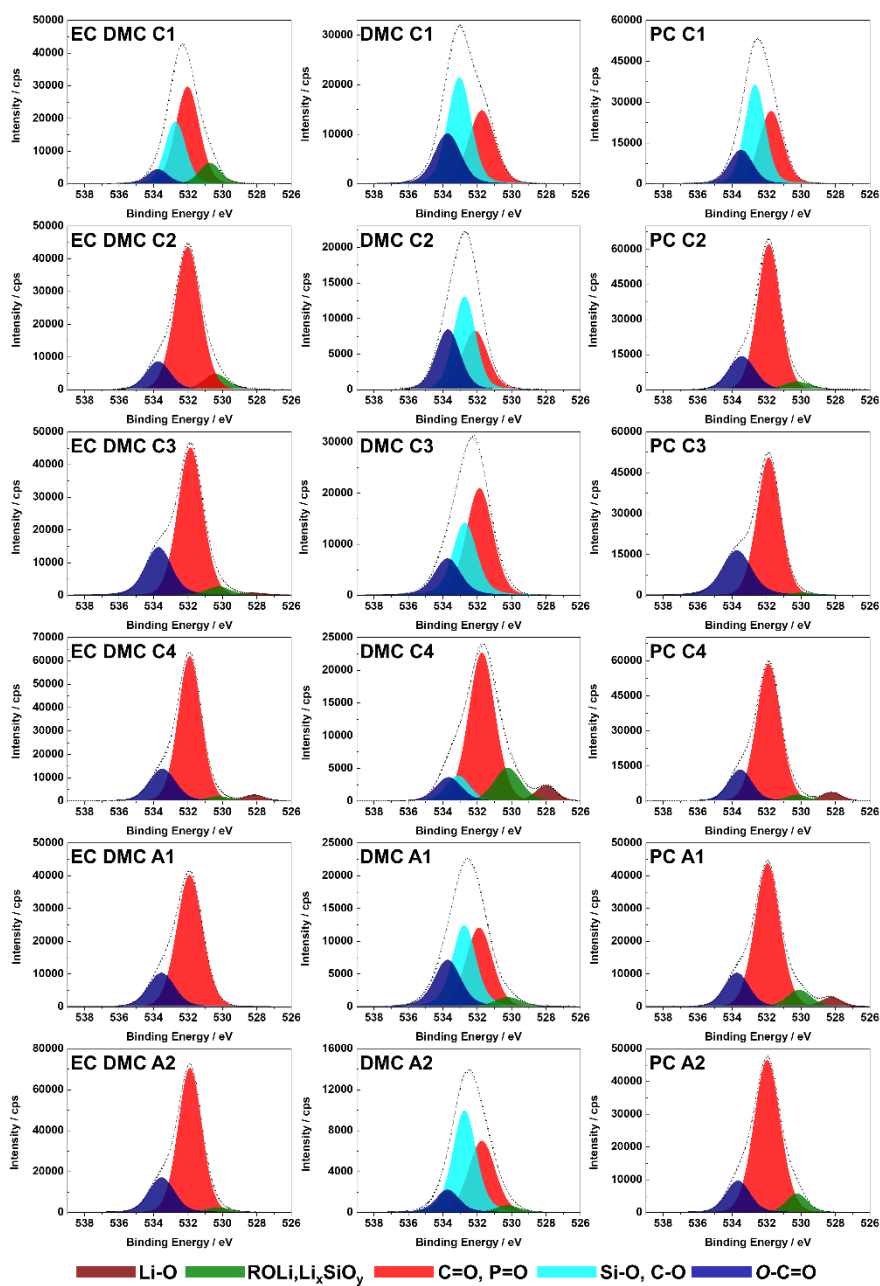

Figure S4 High resolution O 1s core level spectra obtained for Si electrodes at different states during the first CV cycle in three different electrolytes (1M LiPF<sub>6</sub>/EC-DMC, 1M LiPF<sub>6</sub>/DMC and 1M LiPF<sub>6</sub>/PC).

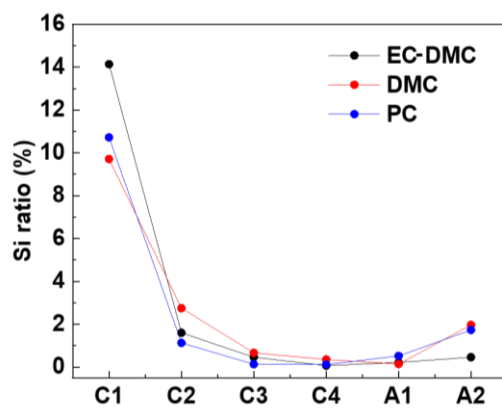

Figure S5 Evolution of Si quantity (in atomic %) at the surface of Si thin film electrode at different stages of lithiation and delithiation performed in different electrolytes.

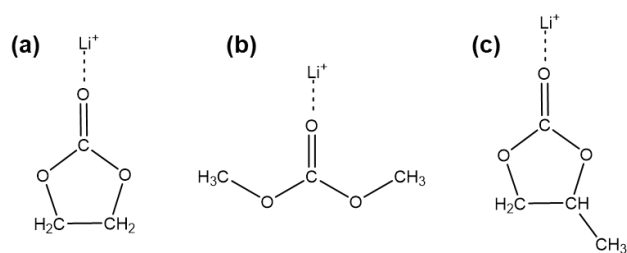

Figure S6 Schematic molecular structure of (a) EC, (b) DMC and (c) PC solvated with lithium ion.

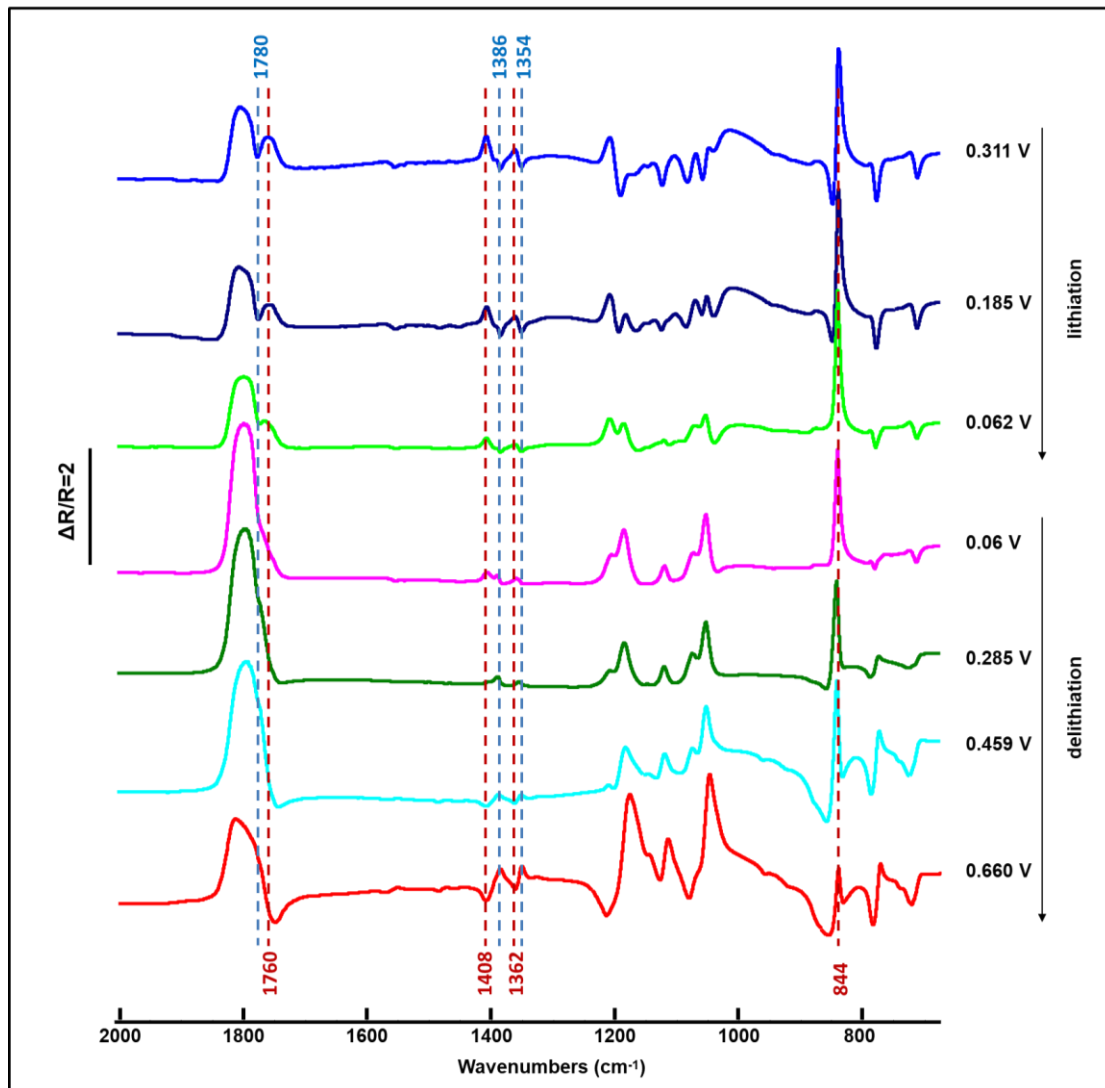

Figure S7 *In situ* MFTIR spectra of Si electrode in 1 M LiPF<sub>6</sub>/PC during the first lithiation and delithiation process. All spectra were calculated by setting 0.611 V as reference potential.

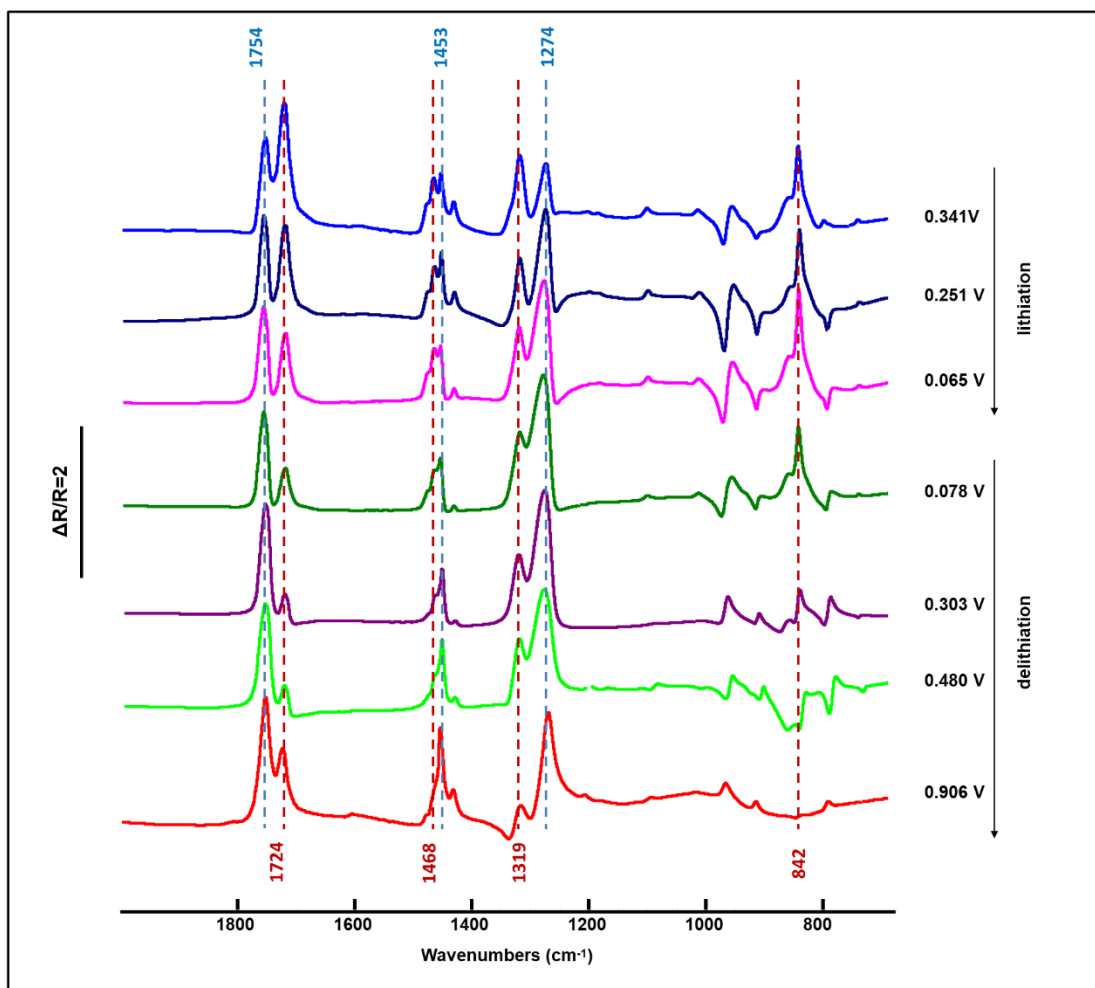

Figure S8 *In situ* MFTIR spectra of Si electrode in 1 M LiPF<sub>6</sub>/DMC during the first lithiation and delithiation process. All spectra were calculated by setting 0.59 V as reference potential.



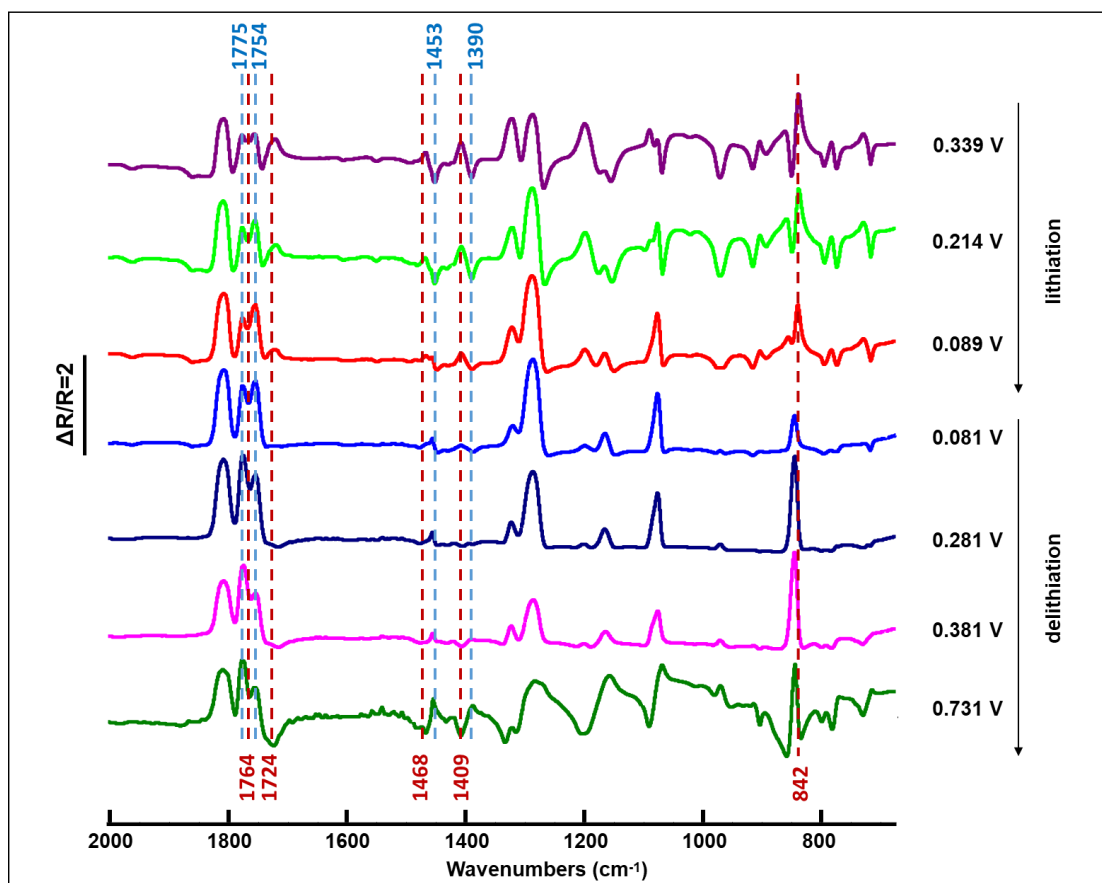

Figure S9 *In situ* MFTIR spectra of Si electrode in 1 M LiPF<sub>6</sub>/EC-DMC (1:1) during the first lithiation and delithiation process. All spectra were calculated by setting 0.671 V as reference potential.

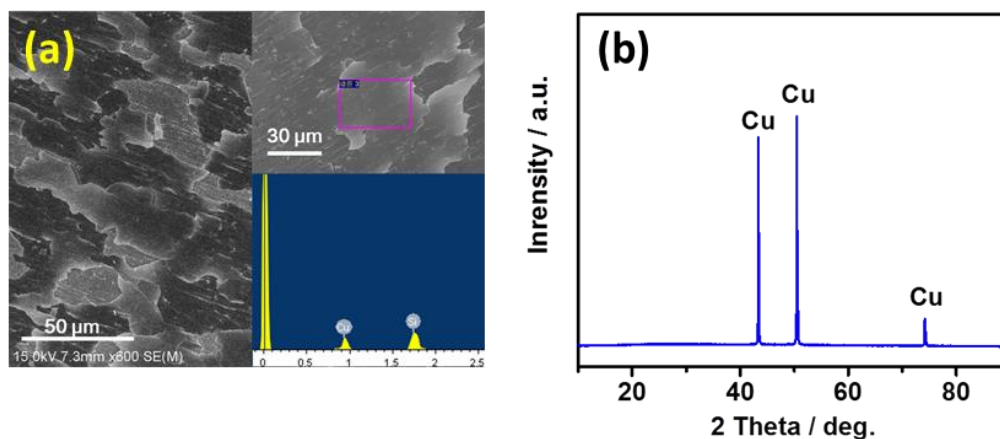

Figure S10 (a) Top-view SEM image of Si thin film electrode. The inserts are the high magnification image (top right) and the EDS of Si thin film electrode (bottom right). (b) XRD pattern of Si thin film electrode.

Figure S10 (a) presents the SEM micrograph of pristine Si thin film electrode. It exhibits a flake-like structure on the Cu substrate. The EDS of the Si thin film inserted to Figure S10(a) confirms the existence of Si and copper. The existence of copper attributes to the Cu current collector. Figure S10(b) displays the XRD pattern of Si thin film electrode, all reflections of this sample are assignable to standard copper (JCPDS No. 48-1550), and no peak matches with crystalline Si indicating the present of amorphous Si on the Cu current collector.
